# Supplementary material for: Smartphone based LSPR sensing platform for bio-conjugation detection and quantification
Source: Royal Society of Chemistry journal article supplement (doi:10.1039/c6ra01113f), 2016-01-01
Supplement: c6ra01113f1.pdf [file c6ra01113f1.pdf]

## Supplementary information

# Smartphone based LSPR sensing platform for bio-conjugation detection and quantification

Sibasish Dutta, Koushik Saikia and Pabitra Nath

*Applied Photonics and Nanophotonics Laboratory, Department of Physics Tezpur University Napaam, Assam, India,*

*\*E-mail: pnath07@gmail.com and dutta.sibasish94@gmail.com*

## Table: wavelength of the standard laser sources with their corresponding pixel positions

Table S1 Pixel positions of the standard laser sources

| Lasers      | Wavelength | Pixel position |
|-------------|------------|----------------|
| Blue Laser  | 405 nm     | 695            |
| Green laser | 533 nm     | 1078           |
| Red laser   | 655 nm     | 1439           |

## Tables: Comparison of smartphone sensor versus spectrophotometer in measurement of resonance wave length of AuNPs under different conditions:

Table S2 Comparison of smartphone and standard spectrophotometer results in determination of average diameter of AuNPs of different size

| Gold nanoparticle size (nm) | LSPR wavelength (Smartphone) | LSPR wavelength (Spectrophotometer) |
|-----------------------------|------------------------------|-------------------------------------|
| 5                           | 514.52 ± 0.286 nm            | 512.54 nm                           |
| 20                          | 524.04 ± 0.367 nm            | 524.22 nm                           |
| 30                          | 527.29 ± 0.341 nm            | 527.45 nm                           |
| 40                          | 531.12 ± 0.483 nm            | 532.70 nm                           |

Table S3 Comparison of smartphone and standard spectrophotometer results in measurement of spectral red-shift of AuNPs (20 nm) upon conjugation with BSA protein.

| BSA conjugated AuNP samples | LSPR wavelength (Smartphone) | LSPR wavelength (Spectrophotometer) |
|-----------------------------|------------------------------|-------------------------------------|
| Bare AuNPs                  | 524.04 nm                    | 524.22 nm                           |
| 0.1 mg/mL BSA               | 526.14 ± 0.075 nm            | 525.31 nm                           |
| 0.2 mg/mL BSA               | 527.29 ± 0.184 nm            | 526.27 nm                           |
| 0.3 mg/mL BSA               | 528.46 ± 0.214 nm            | 528.41 nm                           |

Table S4 Comparison of smartphone and standard spectrophotometer results in measurement of spectral red-shift of AuNPs (20 nm) upon conjugation with Trypsin enzyme.

| Trypsin conjugated AuNP samples | LSPR wavelength (Smartphone) | LSPR wavelength (Spectrophotometer) |
|---------------------------------|------------------------------|-------------------------------------|
| Bare AuNPs                      | 524.04 nm                    | 524.22 nm                           |
| 0.1 mg/mL Trypsin               | 525.62 ± 0.159 nm            | 525.02 nm                           |
| 0.2 mg/mL Trypsin               | 527.12 ± 0.106 nm            | 527.24 nm                           |
| 0.3 mg/mL Trypsin               | 527.50 ± 0.122 nm            | 528.30 nm                           |

Figures: Accuracy in resonance wavelength of AuNPs under different conditions as measured with the designed smartphone sensor and standard spectrophotometer:

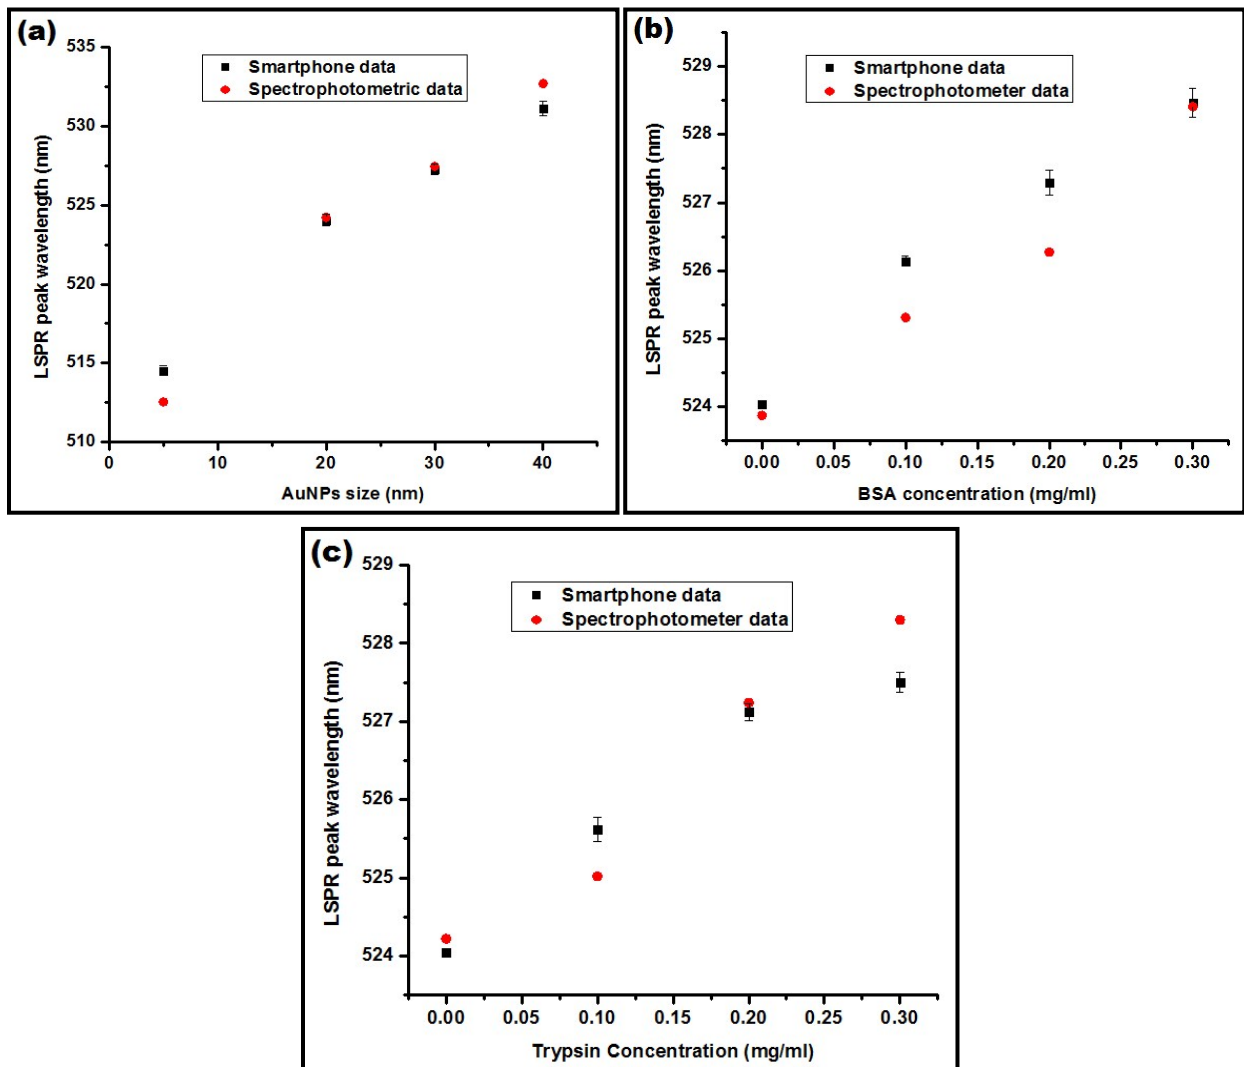

Fig. S1. Accuracy between (a) spectral red-shift corresponding to size variation of AuNPs as obtained with smartphone sensor and standard spectrophotometer (b) spectral red-shift for BSA-AuNPs conjugates for different concentration of BSA (0- 0.3 mg/mL) as measured by smartphone spectrophotometer w.r.t standard spectrophotometer and (c) spectral red-shift of Trypsin-AuNPs conjugates for different concentration of Trypsin (0- 0.3 mg/mL) as obtained with smartphone sensor and standard spectrometer.

**Smartphone sensor response for BSA conjugation with AuNPs (40 nm):**

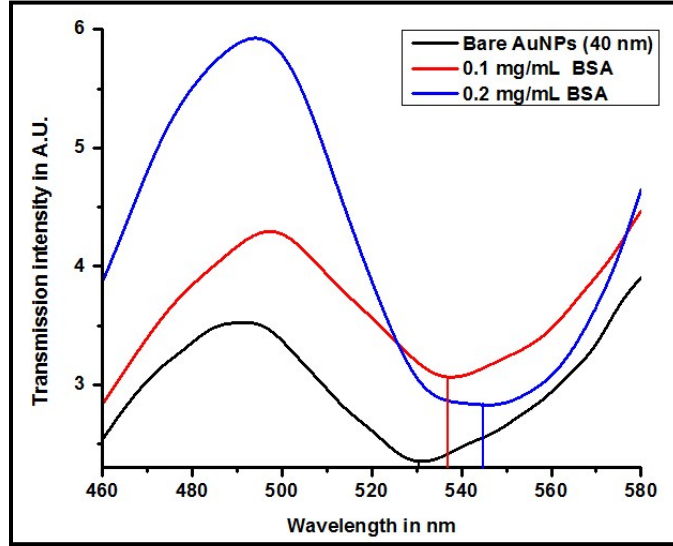

Fig. S2 Characteristic transmission plot of BSA-AuNPs conjugates (BSA concentration : 0 to 0.2mg/mL) for 40 nm AuNPs as obtained from the smartphone based LSPR biosensor.

**Price of optical components (All from Edmund Optics)**

| Sl. No.       | Optical components   | Specifications                | Item No. | Cost (\$)     |
|---------------|----------------------|-------------------------------|----------|---------------|
| 1             | Pinhole              | 50 $\mu$ m                    | NT36-391 | 47.00         |
| 2.            | Plano-convex lens    | FL: 75 mm and Diameter: 10 mm | NT63-491 | 36.00         |
| 3.            | Cylindrical lens     | FL: 50 mm and Diameter: 12.5  | NT48-354 | 56.50         |
| 4.            | Transmission Grating | 1200 lines/mm                 | NT49-578 | 85.00         |
| <b>Total:</b> |                      |                               |          | <b>224.50</b> |

All optical components were purchased from EO<sup>®</sup> Edmund Optics, USA
